# Supplementary material for: Assessment of genetically modified maize DP51291 (application GMFF‐2021‐0071)
Source: PubMed Central journal article supplement (PMC11552030; doi:10.2903/j.efsa.2024.9059), 2024-11-11
Supplement: EFS2-22-e9059-s004.pdf [file EFS2-22-e9059-s004.pdf]

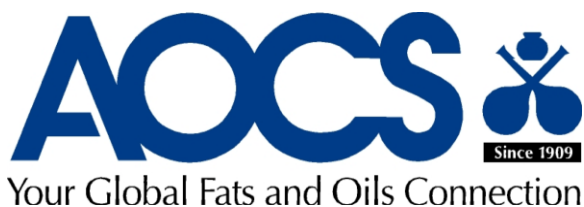

**Street Address:**

AOCS, 3356 Big Pine Trail Ste C/D  
Champaign, IL 61822 USA

**Phone:** +1-217-359-2344

**E-Mail:** CRM@aocs.org; **Web:** www.aocs.org

## **Certified Reference Materials**

### **AOCS 0723-B**

Report of the certification process for

DP-051291-2

Maize Certified Reference Material

First Batch

OECD Unique ID DP-Ø51291-2

Denise Williams  
Technical Services Manager

Tiffanie West  
Technical Director

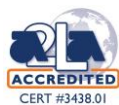

ISO 17034:2016  
A2LA Certificate 3438.01

## **Legal Notice**

Neither AOCS nor any person acting on behalf of AOCS is responsible for the use which might be made of the following information.

## **AOCS Mission Statement**

AOCS advances the science and technology of oils, fats, proteins, surfactants, and related materials, enriching the lives of people everywhere.

More information regarding AOCS is available at <http://www.aocs.org>

# Contents

|                                                                   |           |
|-------------------------------------------------------------------|-----------|
| <b>Abstract.....</b>                                              | <b>4</b>  |
| <b>Acknowledgements.....</b>                                      | <b>5</b>  |
| <b>Glossary.....</b>                                              | <b>6</b>  |
| <b>Introduction .....</b>                                         | <b>8</b>  |
| <b>Material Processing .....</b>                                  | <b>8</b>  |
| <b>Trait Verification to Certify Presence of DP-051291-2.....</b> | <b>8</b>  |
| <b>Certified Value and Measurement Uncertainty .....</b>          | <b>9</b>  |
| <b>Homogeneity .....</b>                                          | <b>10</b> |
| <b>Stability .....</b>                                            | <b>11</b> |
| <b>References.....</b>                                            | <b>13</b> |

## **Abstract**

This report describes the preparation and certification of the maize CRM AOCS 0723-B produced by AOCS Technical Services in 2023. The CRMs have been prepared according to ISO 17034:2016 and are intended to serve as control material for third party testing of maize for transformation events. The maize DP-051291-2 powder was provided by Corteva Agriscience, Johnston, IA. It was prepared by grinding the bulk seed at Corteva Agriscience. The certified value of AOCS 0723-B was based on the purity of the plant leaves from the bulk seed material and with 95% confidence, the true value is  $\geq 920$  g/kg. The powder was aliquoted and bottled in 27-mL glass headspace vials and sealed under a nitrogen gas environment at Illinois Crop Improvement Association. The presence of DP-051291-2 and the homogeneity in AOCS 0723-B was verified using event-specific, quantitative PCR analysis by Eurofins-GeneScan GmbH, Freiburg, Germany (an ISO 17025 accredited laboratory). CRM samples should be stored in a dry, sealed container at ambient or cooler conditions in the dark.

## **Acknowledgements**

The authors would like to express sincere appreciation and gratitude to several individuals and their companies for support and guidance throughout this project. Thanks go to Margit Ross, Corteva Agriscience, for offering AOCS the opportunity to manufacture and distribute these products; to Megann Coad at Illinois Crop Improvement Association for packaging the samples; and Anna Holt and Franziska Peters, Eurofins-GeneScan GmbH for event-specific, quantitative PCR analysis including the provision of information on running the analyses and interpreting the results.

## Glossary

|                   |                                                                                                                                                                                                                                                                                                                                             |
|-------------------|---------------------------------------------------------------------------------------------------------------------------------------------------------------------------------------------------------------------------------------------------------------------------------------------------------------------------------------------|
| AOCS              | American Oil Chemists' Society                                                                                                                                                                                                                                                                                                              |
| Conventional Crop | Crop variety with no history of transgenic technology and is produced through traditional plant-breeding techniques that rely on selecting and mating parent plants possessing promising traits and repeatedly selecting for superior performance among their offspring                                                                     |
| DNA               | Deoxyribonucleic Acid is the linear, double-helix macromolecule that makes up the genetic material of most organisms                                                                                                                                                                                                                        |
| Detection Limit   | Lowest level at which target DNA can be detected in a sample.                                                                                                                                                                                                                                                                               |
| EC                | European Commission                                                                                                                                                                                                                                                                                                                         |
| Genome            | The full set of genes and associated DNA characteristic of an organism                                                                                                                                                                                                                                                                      |
| ISO               | International Organization for Standardization                                                                                                                                                                                                                                                                                              |
| GMO               | Organism that has had genetic sequences modified using molecular-level techniques                                                                                                                                                                                                                                                           |
| PCR               | Polymerase Chain Reaction: technique used to determine whether a sample of plant tissue contains a particular DNA sequence. PCR relies on primer sets that zero in on a particular target DNA sequence and a special DNA-copying enzyme (DNA polymerase) that makes enough copies of the target sequence for identification and measurement |
| Qualitative PCR   | PCR methods that determine the presence or absence of a specific target DNA sequence at a particular level of detection                                                                                                                                                                                                                     |

|                    |                                                                                                    |
|--------------------|----------------------------------------------------------------------------------------------------|
| Quantitation Limit | Lowest level at which the amount of target DNA sequence in a sample can be reproducible.           |
| Quantitative PCR   | PCR methods that estimate the relative amount of target DNA sequence in a mixture of DNA molecules |
| Trait: DP-051291-2 | Provides corn rootworm resistance and glufosinate herbicide resistance                             |

## **Introduction**

Plant genetic modification is an extension of traditional plant breeding. It allows plant breeders to develop crops with specific traits including insect, disease, and herbicide resistance; processing advantages; and nutritional enhancement. An important component for identifying these new traits is a Certified Reference Material created from leaf, seed, or grain containing the new trait as well as a CRM created from the conventionally bred matrix. The European Commission has mandated that from 18 April 2004, a method for detecting a new event derived from transgenic technology and Certified Reference Material must be available before the EC will consider authorizing acceptance of a new crop derived from transgenic technology. Several nations outside Europe also require grain and ingredients to be labeled above a threshold level before accepting a shipment.

To meet the above regulatory requirements for GMO determination, AOCS 0723-B was manufactured from maize according to ISO 17034:2016 and in accordance with EC No 1829/2003, EC No 641/2004 and EC No 619/2011. This CRM is available from AOCS.

## **Material Processing**

DP-051291-2 maize seeds used to prepare AOCS 0723-B were homozygous through successive breeding generations, and the donor for the DP-051291-2 maize event was the female parent to create hemizygous seed. Corteva Agriscience milled ~4 kg of DP-051291-2 maize seed. All of the seed powder was passed through a 500 µm mesh sieve. The seed powder was delivered to AOCS who contracted Illinois Crop Improvement Association for packaging the samples. The powder was aliquoted and bottled in 27-mL glass headspace vials and sealed under a nitrogen gas environment.

## **Trait Verification to Certify Presence of DP-051291-2**

The presence of the DP-051291-2 trait was assessed on 10 vials of AOCS 0723-B. Sample numbers that were selected were sent to Eurofins-GeneScan GmbH, Freiburg,



Germany (an ISO 17025 accredited laboratory) for event-specific, quantitative PCR analysis to verify the presence of DP-051291-2 in the samples (Table 1).

**Table 1. Trait verification testing on AOCS 0723-B DP-051291-2 maize performed by Eurofins-GeneScan GmbH (an ISO 17025 accredited laboratory).**

| <b>AOCS 0723-B Sample</b> | <b>Trait DP-051291-2 Presence</b> |
|---------------------------|-----------------------------------|
| Sample # 17               | Positive                          |
| Sample # 44               | Positive                          |
| Sample # 86               | Positive                          |
| Sample # 128              | Positive                          |
| Sample # 153              | Positive                          |
| Sample # 211              | Positive                          |
| Sample # 255              | Positive                          |
| Sample # 289              | Positive                          |
| Sample # 304              | Positive                          |
| Sample # 384              | Positive                          |

## **Certified Value and Measurement Uncertainty**

The genetic purity of the seed lot used to produce AOCS 0723-B was assessed by Corteva Agriscience. A total of 176 maize seeds were subjected to individual plant testing for the presence of DP-051291-2 by qualitative event-specific PCR. 176 of the 176 seeds tested positive for the presence of DP-051291-2.

Purity estimation was calculated using SeedCalc8 (Remund *et al.*, 2008) and corresponded to the lower bound of true % purity. The % purity in the sample was 100%, when 176 seeds were tested. Using a 95% confidence level, the true % purity of the DP-051291-2 seed lot was at least 92.0%. Consequently, with 95% confidence, the true value is  $\geq 920$  g/kg.

The measurement uncertainty ( $U_{CRM}$ ) is the expanded uncertainty with a coverage factor of 2 and a confidence level of 95%. It is obtained by combining the uncertainties from the

purity assessment ( $u_{char,rel}$ ), the homogeneity assessment ( $u_{bb,rel}$ ), the transport stability assessment ( $u_{sts,rel}$ ) and the long-term stability assessment ( $u_{lts,rel}$ ):

$$u_{CRM,rel} = \sqrt{u_{char,rel}^2 + u_{bb,rel}^2 + u_{sts,rel}^2 + u_{lts,rel}^2}$$
$$U_{CRM} = 2 \times u_{CRM,rel} \times 1000 \text{ g/kg}$$

Consequently, the expanded measurement uncertainty for AOCS 0723-B is -80 g/kg.

## Homogeneity

The homogeneity of AOCS 0723-B is related to the purity of the seeds. 176 out of 176 seeds were subjected to individual plant testing and all tested positive for the DP-051291-2 maize event by event-specific PCR. Based on the sample purity of 100%, as determined using SeedCalc8, the batch was expected to be homogenous.

To further confirm homogeneity, ten vials of AOCS 0723-B (randomly selected as described above) were provided by AOCS to Eurofins-GeneScan GmbH, Freiburg, Germany (an ISO 17025 accredited laboratory). Homogeneity was assessed using the DP-051291-2 specific quantitative PCR method (Corteva Agriscience method). For each of the 10 CRM vials analyzed, there were 2 independent DNA extractions. Each DNA extraction was subject to 3 PCR replicates. The data produced from these PCR reactions provided the numeric copies of DP-051291-2 and the numeric copies of *hmg*, a maize specific endogenous reference gene. The property value assessed here is defined as the ratio between copies of the DP-051291-2 target and copies of the *hmg* target.

The PCR data was used to evaluate the within-unit and between-unit homogeneity of AOCS 0723-B to ensure that the property value is valid within vials of CRM and between vials of CRM. The CRM will be determined to be homogeneous if the within relative standard deviation ( $RSD_w$ ) and between-unit relative standard deviation ( $RSD_b$ ) are both  $\leq 20\%$ .

Quantification of between-unit (vial/sample) inhomogeneity was undertaken by analysis of variance (ANOVA), which separates the between-unit variation from the within-unit

variation. Preliminary analysis showed that there is no significant variation between the two DNA extractions within each vial, so the DNA extraction effect was not considered in the analysis. That is, all replicates for each vial were treated as independent observations regardless of which DNA extraction they were from.

Within-unit relative standard deviation ( $RSD_w$ ), between-unit relative standard deviation ( $RSD_b$ ) were calculated as:

$$\text{Within-unit RSD: } RSD_w = \frac{\sqrt{MS_{within}}}{\bar{y}}$$

$$\text{Between-unit RSD: } RSD_b = \frac{\sqrt{\frac{MS_{between} - MS_{within}}{n}}}{\bar{y}}$$

where,

$MS_{within}$       within-unit mean square from an ANOVA  
 $MS_{between}$     between-unit mean square from an ANOVA  
 $\bar{y}$               mean of all results of the homogeneity study  
 $n$                 mean number of replicates per unit

**Table 2. The within-unit relative standard deviation ( $RSD_w$ ), and the between-unit relative standard deviation ( $RSD_b$ ) for vials of AOCS 0723-B.**

| CRM         | $RSD_w$ [%] | $RSD_b$ [%]       | $u^*_{bu,rel}$ [%] |
|-------------|-------------|-------------------|--------------------|
| AOCS 0723-B | 8.0         | n.c. <sup>1</sup> | 3.8                |

<sup>1</sup>n.c.:  $RSD_b$  cannot be calculated as  $MS_{between} < MS_{within}$ . In this situation, maximum hidden inhomogeneity ( $u^*_{bu,rel}$ ) is provided as an alternative

This confirms the homogeneity of AOCS 0723-B.

## Stability

Time, temperature and light are regarded as the most relevant influences on the stability of CRM (Linsinger, et al., 2001). The influence of light is mitigated by shipping and storing the vials in boxes, thus minimizing the possibility of degradation due to light. The influence of temperature is mitigated by storing the vials in a temperature-controlled room, and shipping vials at ambient temperature.

The effect of temperature and time are investigated.

A transport (short-term) stability study is conducted to assess the stability of maize CRM during transport. The temperature and time conditions in the study cover the typical conditions and the not so rare situations. The outcome of the study is considered transferable to other CRMs of similar property. Samples were subject to 3 different temperatures (4 °C (fridge), 25 °C (ambient), 60 °C (oven)) for 4 different durations (0, 1, 2, and 4 weeks). The study concluded that samples are stable at 4 °C (fridge) and 25 °C (ambient) for 4 weeks. The estimated uncertainty contribution from transport (short-term) stability is 1.0%.

A long-term stability study is conducted to assess the stability of maize CRM during storage. Samples are stored at 25 °C (ambient) and the stability of the sample is monitored as long as the samples is available. The storage temperature studied is 25 °C and the length of time to be studied is 10 years. The outcome of the study is considered transferable to other CRMs of similar property. In the initial 1-year stability study, samples were subject the storage condition for 4 different durations (0, 1, 3, 6 and 12 months). The study concluded that samples are stable at 25 °C (ambient) for 12 months. The estimated uncertainty contribution from long-term stability is 0.42%.

CRM stability over time will be analyzed by repeating the homogeneity study described above at a chosen shelf life of approximately every 24 months. The 24-month shelf life of CRM is chosen because the influence of analytical variation can be reduced by increasing the length of the stability study (Linsinger, et al., 2001).

The initial ratio between the number of copies of the GM event and the number of copies of the endogenous reference gene from the homogeneity study will establish the base line for the stability study. The ratio at each 24-month interval will be compared to the ratio established in the homogeneity study. The CRM will be determined to be stable if the variability of the ratios, determined as relative standard deviation (RSD) is  $\leq 20\%$ .

Stability of these CRMs has been listed as 2 years from the certification date. The materials were processed and are stored at ambient temperature, under nitrogen gas, in 27 -mL glass headspace vials. These materials are expected to be stable for longer than

the estimated expiration date. The stability of the powder material will be reevaluated at time of expiration. If the samples are determined to be stable, the certificates will be extended.

## References

Eurofins-GeneScan GmbH, Engresserstraße 4, D-79108 Freiburg, Germany Telephone: +49 761 6400 4011 Online: <https://www.eurofinsus.de/food-analysis>

Illinois Crop Improvement Association, 3105 Research Road, Champaign, IL 61826; Telephone: +1 217 359 4053 Fax: +1 217 359 4075; <http://www.ilcrop.com/index.htm>

ISO 17034:2016 (E) General requirements for the competence of reference material producers

ISO 17025:2005 and ISO 17025:2017, General Requirements for the Competence of Testing and Calibration Laboratories

International Seed Testing Association, International Rules of Seed Testing: Seed Science and Technology Rules, 2012

Regulation (EC) No 1829/2003 of the European Parliament and of the Council of 22 September 2003 on genetically modified food and feed; <https://eur-lex.europa.eu/legal-content/EN/TXT/PDF/?uri=CELEX%3A32003R1829&from=en>

Linsinger T.P.J., Pauwels J., van der Veen A.M.H., Schimmel H., and Lamberty A. 2001. Homogeneity and stability of reference materials. *Accred. Qual. Assur.* 6:20-25.

Remund K., Simpson R., Laffont J-L., Wright D., and Gregoire S. Seedcalc8. 2008. <https://www.seedtest.org/en/statistical-tools-for-seed-testing-content---1--3449-1102.html>
